# Supplementary material for: Identification of multiple serine hydrolases involved in virulence and cell envelope integrity of Klebsiella pneumoniae
Source: Research Square preprint supplement (doi:10.21203/rs.3.rs-6281911/v1), 2025-04-14
Supplement: Supplementary file 1 [file 58535bbac7b68f05409ce179.pdf]

## Supporting Information

### Identification of multiple serine hydrolases involved in virulence and cell envelope integrity of *Klebsiella pneumoniae*

Md Jalal Uddin<sup>1</sup>, George Randall<sup>2</sup>, Jiyun Zhu<sup>3</sup>, Tulsi Upadhyay<sup>3</sup>, Anique Johanna Elisabeth Maria Driessen<sup>1</sup>, Laura van Eijk<sup>4</sup>, Paul B. Stege<sup>4</sup>, Frerich M. Masson<sup>4</sup>, Marco C. Viveen<sup>4</sup>, Matthew Bogyo<sup>3</sup>, Matthias Fellner<sup>2</sup>, Marcel R. de Zoete<sup>4</sup>, Mona Johannessen<sup>1</sup> and Christian S. Lentz<sup>1</sup>

1. Centre for New Antibacterial Strategies (CANS) and Department of Medical Biology (IMB), Host-Microbe Interactions Research Group, UiT The Arctic University of Norway, 9019 Tromsø, Norway

2. Biochemistry Department, School of Biomedical Sciences, University of Otago, Dunedin 9054, New Zealand

3. Department of Pathology, Stanford University School of Medicine, Stanford, California 94305, United States

4. Department of Medical Microbiology, UMC Utrecht, Utrecht, 3584 CX, The Netherlands

### Table of Contents

|                                                                                                                                               |         |
|-----------------------------------------------------------------------------------------------------------------------------------------------|---------|
| Table S1: List of bacterial strains used in this study.....                                                                                   | page 2  |
| Table S2: List of serine hydrolases identified in <i>K. pneumoniae</i> by MS-ABPP .....                                                       | page 3  |
| Table S3: The homology percentage data used for Figure 1F                                                                                     |         |
| Table S4: Collection statistics of x ray crystallography datasets used .....                                                                  | page 3  |
| to determine the structures of YjfP and YqiA.....                                                                                             | page 4  |
| Table S5: Refinement and validation statistics of YjfP and YqiA crystal structures.....                                                       | page 4  |
| Figure S1: Homology analysis of <i>K. pneumoniae</i> serine hydrolases. ....                                                                  | page 5  |
| Figure S2: PCR validation of transposon mutants.....                                                                                          | page 6  |
| Figure S3: Growth curves of <i>K. pneumoniae</i> MKP103 and isogenic SH-deficient<br>transposon mutant on organoids secreted substances ..... | page 7  |
| Figure S4: Detergent susceptibility of SH-deficient transposon mutants .....                                                                  | page 7  |
| Figure S5: Coomassie-stained images of purified YjfP, YqiA, and PldB.....                                                                     | page 8  |
| Figure S6: Secondary structures of YjfP .....                                                                                                 | page 8  |
| Figure S7: Structural analysis of YqiA.....                                                                                                   | page 9  |
| Figure S8: Gel-filtration chromatogram of YjfP, YqiA .....                                                                                    | page 9  |
| Supplementary References .....                                                                                                                | page 10 |

## Supplementary tables

**Table S1.** List of bacterial strains used in this study.

| Strain                     | Description                                                                                                                | Reference/Source |
|----------------------------|----------------------------------------------------------------------------------------------------------------------------|------------------|
| <i>K. pneumoniae</i> MP103 | KPNIH1 derivative with the KPC-3 carbapenemase-encoding gene deleted and Parent strain of Moinul Transposon Mutant Library | <sup>1</sup>     |
| <i>degP</i> :Tn            | Transposon insertion mutant in MKP103 KPNIH1_04540                                                                         |                  |
| <i>ychK</i> :Tn            | Transposon insertion mutant in MKP103 KPNIH1_15760                                                                         |                  |
| <i>ybfF</i> :Tn            | Transposon insertion mutant in MKP103 KPNIH1_07725                                                                         |                  |
| <i>catD</i> :Tn            | Transposon insertion mutant in MKP103 KPNIH1_12245                                                                         |                  |
| <i>pldB</i> :Tn            | Transposon insertion mutant in MKP103 KPNIH1_00895                                                                         |                  |
| <i>degQ</i> :Tn            | Transposon insertion mutant in MKP103 KPNIH1_23755                                                                         |                  |
| <i>yjffP</i> :Tn           | Transposon insertion mutant in MKP103 KPNIH1_02230                                                                         |                  |

**Table S2.** List of serine hydrolases identified in *K. pneumoniae* by MS-ABPP

| Gene        | Previous annotation                | MW [kDa] | Strain KPNIH1 locus tag |
|-------------|------------------------------------|----------|-------------------------|
| <i>degP</i> | Serine endoprotease                | 49,5     | KPNIH1_04540            |
| <i>ychK</i> | Patatin-like phospholipase         | 33,3     | KPNIH1_15760            |
| <i>ybfF</i> | Acyl-CoA esterase                  | 28,5     | KPNIH1_07725            |
| <i>catD</i> | 3-oxoadipate enol-lactonase        | 27,3     | KPNIH1_12245            |
| <i>pldB</i> | Lysophospholipase L2               | 38,2     | KPNIH1_00895            |
| <i>degQ</i> | Serine endoprotease                | 47,2     | KPNIH1_23755            |
| <i>YqiA</i> | Esterase                           | 21,5     | KPNIH1_22780            |
| <i>YcfP</i> | Esterase                           | 21,1     | KPNIH1_09915            |
| <i>bioH</i> | Pimeloyl-ACP methyl ester esterase | 28,3     | KPNIH1_24570            |
| <i>yjfP</i> | Esterase                           | 26,5     | KPNIH1_02230            |

**Table S3.** The homology percentage data used for Figure S1.

All BLASTp results for a homolog of the *K. pneumoniae* SHs are provided in a separate Excel file

|                                                                   | DegP  | YchK  | YbfF  | CatD  | PldB  | DegQ  | YqiA  | YcfP  | BioH  | YjfP  |
|-------------------------------------------------------------------|-------|-------|-------|-------|-------|-------|-------|-------|-------|-------|
| <i>Bifidobacterium adolescentis</i> ATCC 15703                    | 0     | 0     | 0     | 0     | 0     | 0     | 0     | 0     | 0     | 28.4  |
| <i>Bifidobacterium longum</i> NCC2705                             | 0     | 0     | 26.6  | 24.3  | 0     | 0     | 0     | 0     | 0     | 27.4  |
| <i>Collinsella aerofaciens</i> ATCC 25986                         | 0     | 0     | 0     | 0     | 0     | 0     | 0     | 0     | 0     | 24.8  |
| <i>Bacteroides caccae</i> ATCC 43185                              | 0     | 0     | 0     | 0     | 0     | 0     | 0     | 0     | 0     |       |
| <i>Bacteroides fragilis</i> ATCC 25285                            | 0     | 0     | 0     | 0     | 0     | 0     | 0     | 0     | 0     | 25.7  |
| <i>Bacteroides ovatus</i> ATCC 8483                               | 0     | 0     | 0     | 0     | 0     | 0     | 0     | 0     | 20.0  | 24.4  |
| <i>Parabacteroides distasonis</i> ATCC 8503                       | 0     | 0     | 0     | 0     | 0     | 0     | 0     | 0     | 0     |       |
| <i>Prevotella copri</i> DSM 18205                                 | 0     | 0     | 0     | 0     | 0     | 0     | 0     | 0     | 0     | 41.3  |
| <i>Clostridium sporogenes</i> ATCC 15579                          | 0     | 0     | 0     | 0     | 0     | 0     | 0     | 0     | 0     | 0     |
| <i>Enterococcus faecalis</i> V583                                 | 0     | 0     | 26.6  | 0     | 0     | 0     | 0     | 0     | 23.6  | 0     |
| <i>Enterococcus faecium</i> ATCC BAA-472                          | 0     | 0     | 0     | 0     | 0     | 0     | 0     | 0     | 29.3  | 0     |
| <i>Lactobacillus ruminis</i> ATCC 25644                           | 0     | 0     | 0     | 0     | 0     | 0     | 0     | 0     | 0     | 0     |
| <i>Ruminococcus gnavus</i> ATCC 29149                             | 0     | 0     | 0     | 0     | 0     | 0     | 0     | 0     | 0     | 0     |
| <i>Fusobacterium nucleatum</i> subsp. <i>nucleatum</i> ATCC 23726 | 0     | 0     | 0     | 0     | 0     | 0     | 0     | 0     | 0     | 0     |
| <i>Edwardsiella tarda</i> ATCC 23685                              | 77.9  | 0     | 0     | 0     | 0     | 62.0  | 0     |       | 0     | 0     |
| <i>Enterobacter cancerogenus</i> ATCC 35316                       | 91.9  | 0     | 0     | 0     | 84.9  | 82.0  | 0     | 90.0  | 0     | 0     |
| <i>Escherichia coli</i> K12 MG1655                                | 90.2  | 81.1  | 0     | 24.7  | 79.7  | 0     | 0     | 0     | 0     | 0     |
| <i>Klebsiella pneumoniae</i> subsp. <i>pneumoniae</i> KPNIH1      | 100.0 | 100.0 | 100.0 | 100.0 | 100.0 | 100.0 | 100.0 | 100.0 | 100.0 | 100.0 |
| <i>Akkermansia muciniphila</i> ATCC BAA-835                       | 0     | 0     | 0     | 0     | 0     | 0     | 0     | 0     | 0     | 0     |
| <i>Homo sapiens</i>                                               | 0     | 0     | 0     | 0     | 25.2  |       |       |       | 30.2  |       |

**Table S4.** Collection statistics of x ray crystallography datasets used to determine the structures of Yjfp and YqiA. Values in parentheses refer to the high-resolution shell.

|                                   | <b>Yjfp</b>                   | <b>YqiA</b>                   |
|-----------------------------------|-------------------------------|-------------------------------|
| Beamline                          | Australian Synchrotron<br>MX2 | Australian Synchrotron<br>MX2 |
| Wavelength<br>(Å / keV)           | 0.954 / 13.00                 | 0.954 / 13.00                 |
| Detector                          | DECTRIS EIGER X 16M           | DECTRIS EIGER X 16M           |
| Space group                       | <i>C</i> 2                    | <i>P</i> 3 <sub>2</sub> 2     |
| a, b, c (Å)                       | 102.71 68.20 65.36            | 62.46 62.46 80.36             |
| $\alpha$ , $\beta$ , $\gamma$ (°) | 90.00 77.16 90.00             | 90.00 90.00 120               |
| Rotation range (°)                | 250                           | 310                           |
| Resolution (Å)                    | 45.11-1.30 (1.32-1.30)        | 44.87-1.50 (1.53-1.50)        |
| Total Reflections                 | 513,218 (23,779)              | 507,705 (23,786)              |
| Unique Reflections                | 106,974 (5,160)               | 29,609 (1,434)                |
| Multiplicity                      | 4.8 (4.6)                     | 17.1 (16.60)                  |
| Completeness (%)                  | 99.2 (97.4)                   | 100.00 (100.00)               |
| I/ $\sigma$ (I)                   | 9.6 (1.7)                     | 13.8 (1.7)                    |
| CC <sub>1/2</sub>                 | 0.998 (0.369)                 | 0.999 (0.568)                 |
| R <sub>merge</sub>                | 0.115 (2.702)                 | 0.121 (5.951)                 |
| R <sub>pim</sub>                  | 0.088 (2.083)                 | 0.043 (2.148)                 |

**Table S5.** Refinement and validation statistics of Yjfp and YqiA crystal structures.

|                                               | <b>Yjfp</b> | <b>YqiA</b> |
|-----------------------------------------------|-------------|-------------|
| PDB ID                                        | 9BD4        | 9BI7        |
| Resolution Range<br>(Å)                       | 45.11-1.30  | 44.87-1.50  |
| Reflections, working                          | 101,407     | 28,024      |
| Reflections, free                             | 5,336       | 1,528       |
| R <sub>work</sub> (%)                         | 16.13       | 17.46       |
| R <sub>free</sub> (%)                         | 17.48       | 21.31       |
| Number of residues                            | 479         | 192         |
| Number of waters                              | 305         | 94          |
| Ligand                                        |             | 2 Ca, 1 Cl  |
| Average <i>B</i> factors<br>(Å <sup>2</sup> ) | 16.22       | 30.84       |
| Ligands                                       |             | 23.88       |
| Waters                                        | 25.01       | 33.35       |
| RMSD                                          |             |             |
| Bonds (Å)                                     | 0.006       | 0.009       |
| Angles (°)                                    | 0.89        | 1.00        |
| Ramachandran                                  |             |             |
| Favoured (%)                                  | 97.89       | 98.42       |
| Outliers (%)                                  | 0           | 0           |
| Rotamer outliers (%)                          | 0.25        | 0           |
| Molprobrity score                             | 0.88        | 1.08        |

## Supplementary figures

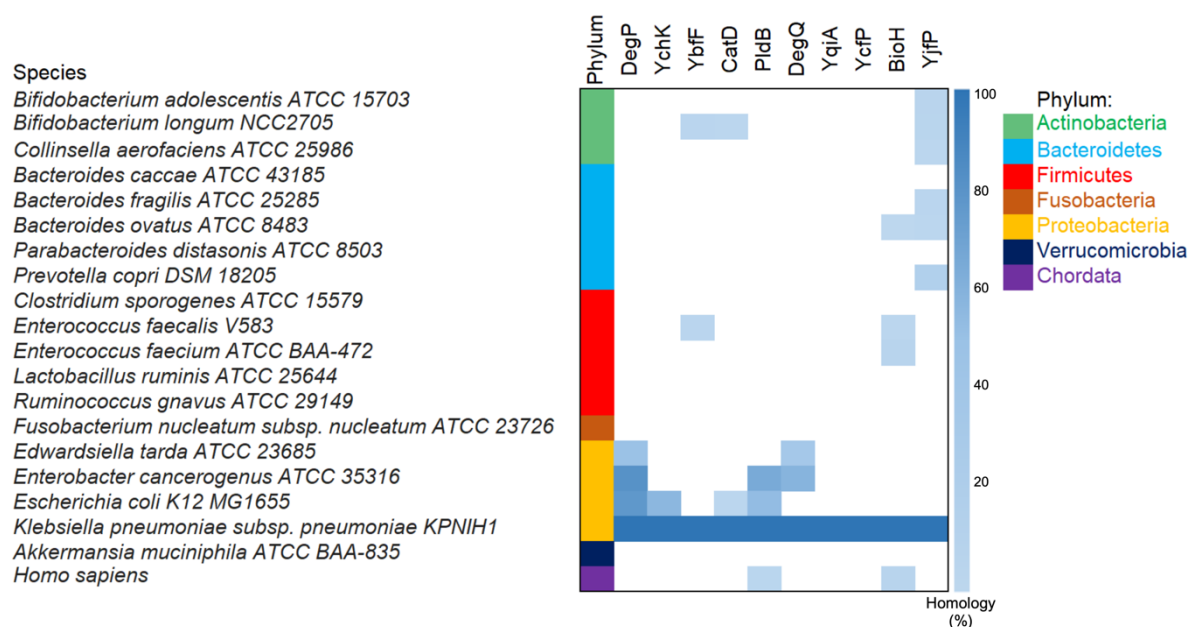

**Supplementary figure S1. Homology analysis of *K. pneumoniae* serine hydrolases.** Heatmap of homologs of *K. pneumoniae* serine hydrolases across 20 representative gut commensal bacterial species and in humans (Chordata), as sourced from the Human Microbiome Project Reference Genomes for the Gastrointestinal Tract database using BLAST-P. In the heatmap, each filled cell indicates that the species has a homolog of the *K. pneumoniae* SHs, as determined by a threshold e-value of  $1 \times 10^{-10}$ ; white background denotes the absence of a homolog. The underlying percentage homology data is listed in table S3.

A

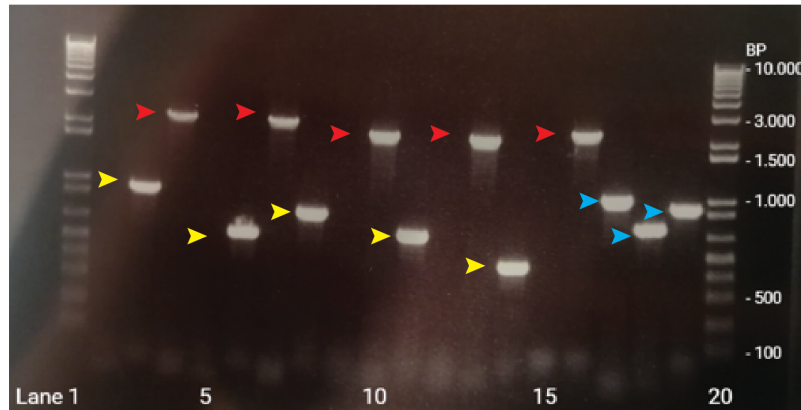

1. 1 Kb ladder
2. *pldB* forward + PMC-140 (*pldB1* lysate)
3. *pldB* reverse + PMC-140 (*pldB1* lysate)
4. *pldB* forward + *pldB* reverse (*pldB1* lysate)
5. *pldB* forward + PMC-140 (*pldB3* lysate)
6. *pldB* reverse + PMC-140 (*pldB3* lysate)
7. *pldB* forward + *pldB* reverse (*pldB3* lysate)
8. *yjfP* forward + PMC-140 (*yjfP1* lysate)
9. *yjfP* reverse + PMC-140 (*yjfP1* lysate)
10. *yjfP* forward + *yjfP* reverse (*yjfP1* lysate)
11. *yjfP* forward + PMC-140 (*yjfP3* lysate)
12. *yjfP* reverse + PMC-140 (*yjfP3* lysate)
13. *yjfP* forward + *yjfP* reverse (*yjfP3* lysate)
14. *ychK* forward + PMC-140 (*ychK1* lysate)
15. *ychK* reverse + PMC-140 (*ychK1* lysate)
16. *ychK* forward + *ychK* reverse (*ychK1* lysate)
17. *pldB* forward + *pldB* reverse (MKP-103 lysate)
18. *yjfP* forward + *yjfP* reverse (MKP-103 lysate)
19. *ychK* forward + *ychK* reverse (MKP-103 lysate)
20. 1 Kb ladder

B

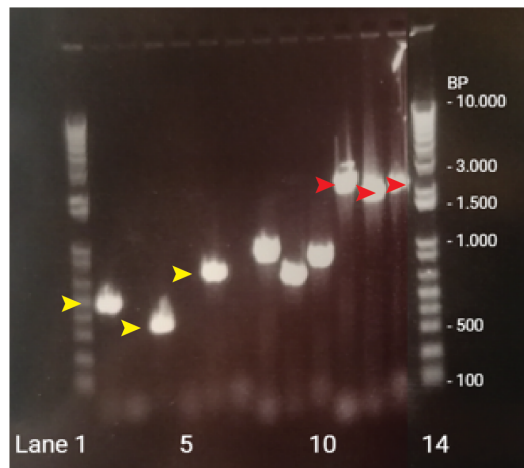

1. 1 Kb ladder
2. *pldB* forward + PMC-140 (*pldB2* lysate)
3. *pldB* reverse + PMC-140 (*pldB2* lysate)
4. *yjfP* forward + PMC-140 (*yjfP2* lysate)
5. *yjfP* reverse + PMC-140 (*yjfP2* lysate)
6. *ychK* forward + PMC-140 (*ychK2* lysate)
7. *ychK* reverse + PMC-140 (*ychK2* lysate)
8. *pldB* forward + *pldB* reverse (MKP-103 lysate)
9. *yjfP* forward + *yjfP* reverse (MKP-103 lysate)
10. *ychK* forward + *ychK* reverse (MKP-103 lysate)
11. *pldB* forward + *pldB* reverse (*pldB2* lysate)
12. *yjfP* forward + *yjfP* reverse (*yjfP2* lysate)
13. *ychK* forward + *ychK* reverse (*ychK2* lysate)
14. 1 Kb ladder

C

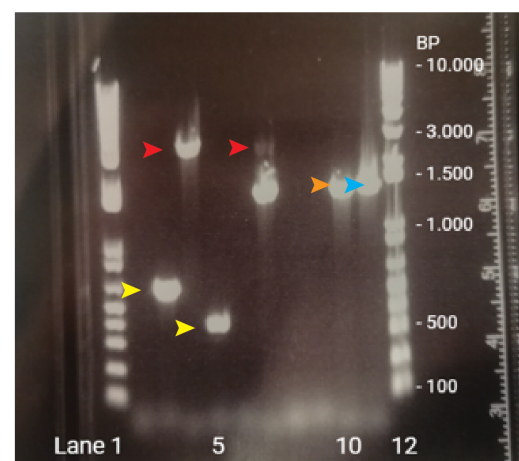

1. 1 Kb ladder
2. *degP* forward + PMC-140 (*degP1* lysate)
3. *degP* reverse + PMC-140 (*degP1* lysate)
4. *degP* forward + *degP* reverse (*degP1* lysate)
5. *degP* forward + PMC-140 (*degP2* lysate)
6. *degP* reverse + PMC-140 (*degP2* lysate)
7. *degP* forward + *degP* reverse (*degP2* lysate)
8. *degP* forward + PMC-140 (*degP3* lysate)
9. *degP* reverse + PMC-140 (*degP3* lysate)
10. *degP* forward + *degP* reverse (*degP3* lysate)
11. *degP* forward + *degP* reverse (MKP-103 lysate)
12. 1Kb ladder

**Supplementary figure S2. PCR validation of transposon mutants.** PCR products were analysed by agarose gel electrophoresis and stained with GelRed Nucleic acid stain and visualized by UV-light. The correct insertion of the transposon into the *pldB*, *yjfP*, was investigated by three PCR reactions using DNA within cell lysates as a template : i) using combination a combination of a gene-specific forward or ii) reverse primer each in combination with a transposon-specific primer (PMC-140) that should give a band only if the transposon is correctly inserted

into the gene (as indicated by yellow arrowhead) iii) A gene-specific PCR with gene-specific forward and reverse primers that in the case of transposon insertion should lead to an increase in amplicon length of approx 1.3 kbp (correct length indicated by red arrowheads). Amplicon size for intact genes are: *pldB*: 993 bp, *yjfP*: 717 bp; *ychK*: 903 bp; *degP*: 1581 bp (blue arrowheads). PCR products were analysed by agarose gel electrophoresis and stained with GelRed Nucleic acid stain and visualized by UV-light. A) Strains *pldB*::Tn1, *pldB*::Tn3, *yjfP*::Tn1, *yjfP*::Tn3, *ychK*::Tn1, and WT; B) *pldB*::Tn2, *yjfP*::Tn2, *ychK*::Tn2, and WT; C) *degP*::Tn1; *degP*::Tn2; *degP*::Tn3 and WT. For strain *degP*::Tn3, neither PCR reaction with a combination of transposon and gene-specific primers (lane 8,9) yielded a product, whereas amplification of the *degP* gene yielded a product of the length as for the WT amplicon (orange arrowhead, lane 10) suggesting that the *degP* gene is intact in this strain.

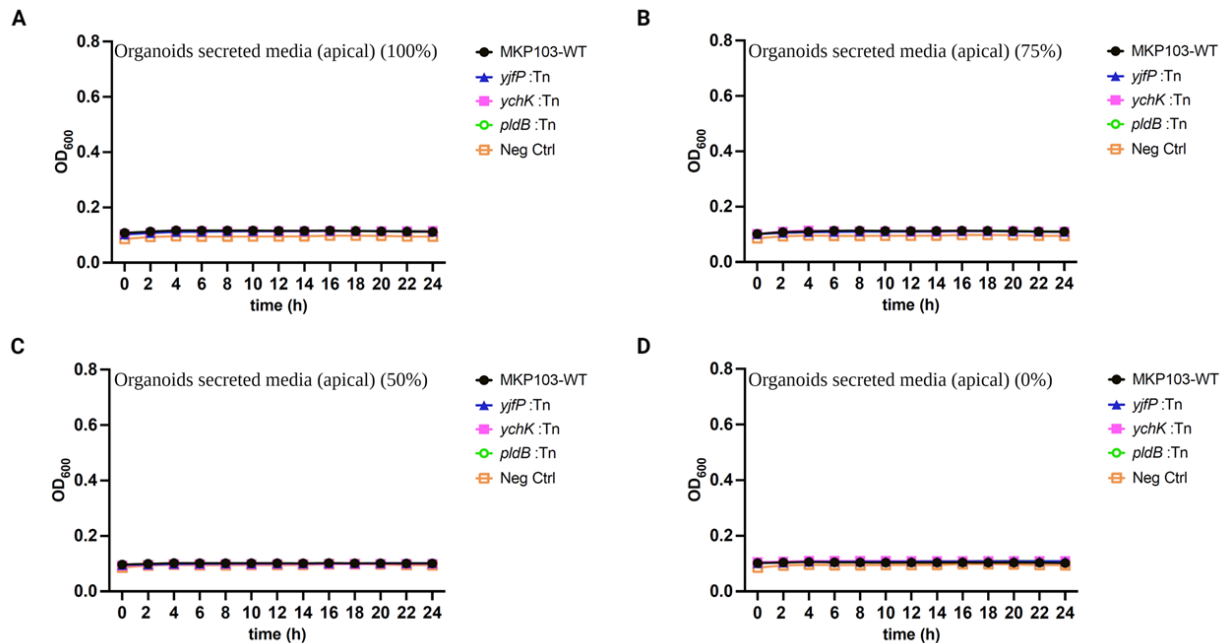

**Supplementary figure S3. Growth curves of *K. pneumoniae* MKP103 and isogenic SH-deficient transposon mutant on organoids secreted substances.** The growth curves of *K. pneumoniae* and SH-deficient mutants were measured over 24 hours in: **A)** media containing 100% secretions from organoid monolayers (collected from the apical side), **B)** media with 75% organoid secretions, **C)** media with 50% organoid secretions, and **D)** media without organoid secretions (consisting only of differentiated organoid media). Growth curves in A-D show means  $\pm$  standard deviation of n=3 independent biological culture replicates

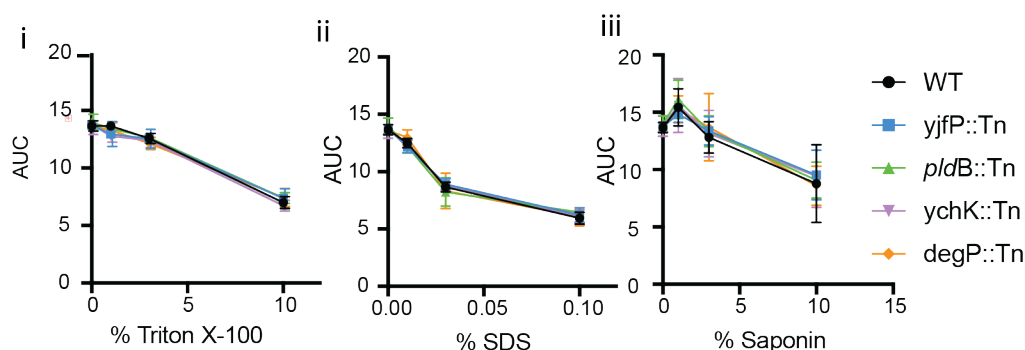

**Supplementary figure S4. Detergent susceptibility of SH-deficient transposon mutants.** WT or indicated transposon mutant strains were cultivated in microplates in the presence of different concentrations of detergent (i) Triton X-100, ii) SDS, iii) saponin) and growth was monitored by OD<sub>600</sub> measurements over 24h. Area under the curve analysis was performed to quantify detergent-induced growth impairment. The graph shows means  $\pm$  standard deviation of n=3 independent biological replicate cultures (recorded with three technical replicates each.)

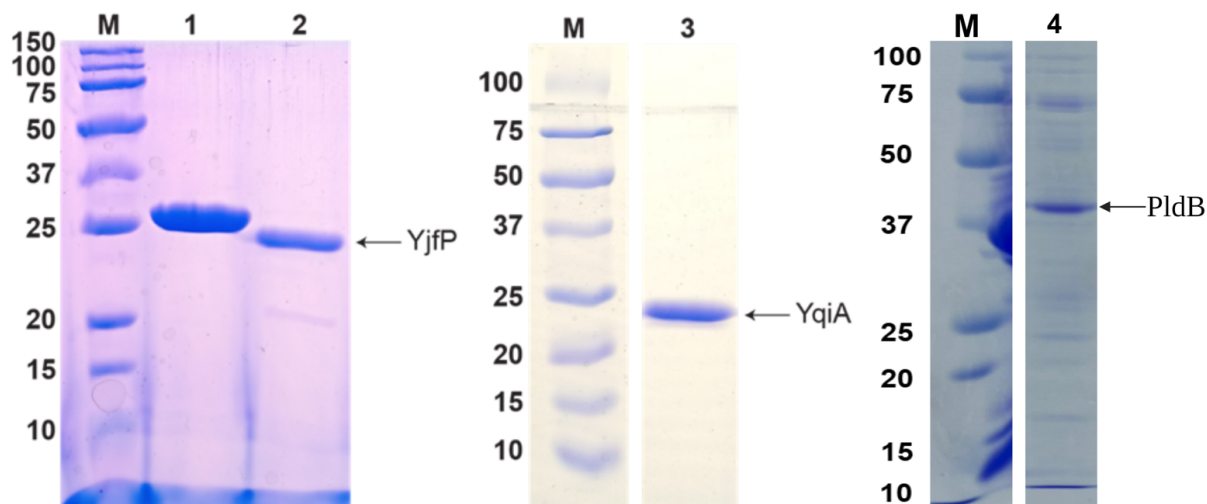

**Supplementary figure S5.** SDS PAGE of purified YjfP, YqiA, and His<sub>6</sub>-PldB. YjfP, YqiA, and PldB purity were assessed by loading onto SDS PAGE gels of 12 % polyacrylamide. Molecular weight markers are in lanes labelled M and the sizes of the bands (in kDa) indicated. His<sub>6</sub> YjfP was loaded into lane 1, YjfP after 3C cleavage loaded into lane 2, YqiA loaded into lane 3, and His<sub>6</sub>-PldB loaded into lane 4. The predicted masses after cleavage of YjfP, YqiA, and PldB are 27 kDa, 22 kDa, and 38 kDa, respectively.

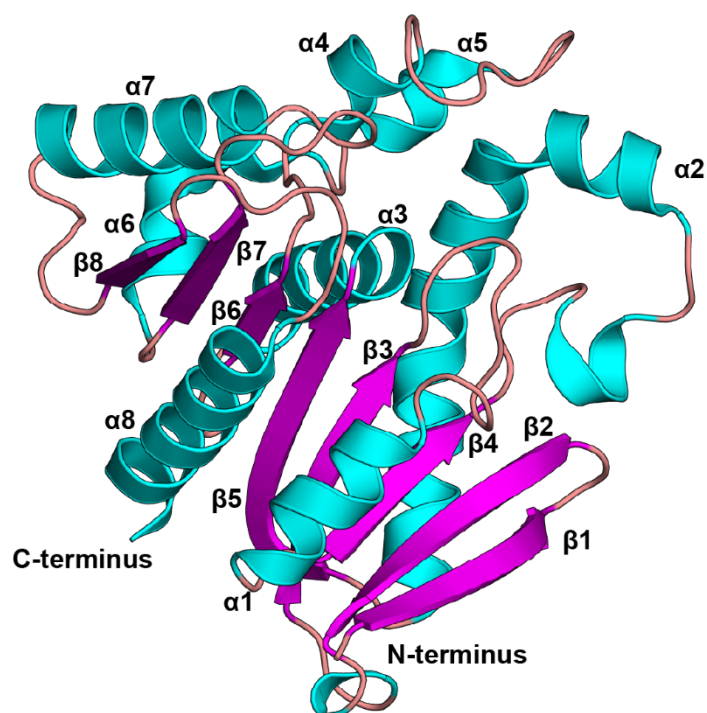

**Supplementary figure S6. Secondary structures of YjfP.** Secondary structure elements are displayed as follows:  $\alpha$  helices (cyan),  $\beta$  sheets (magenta), and loops (beige).



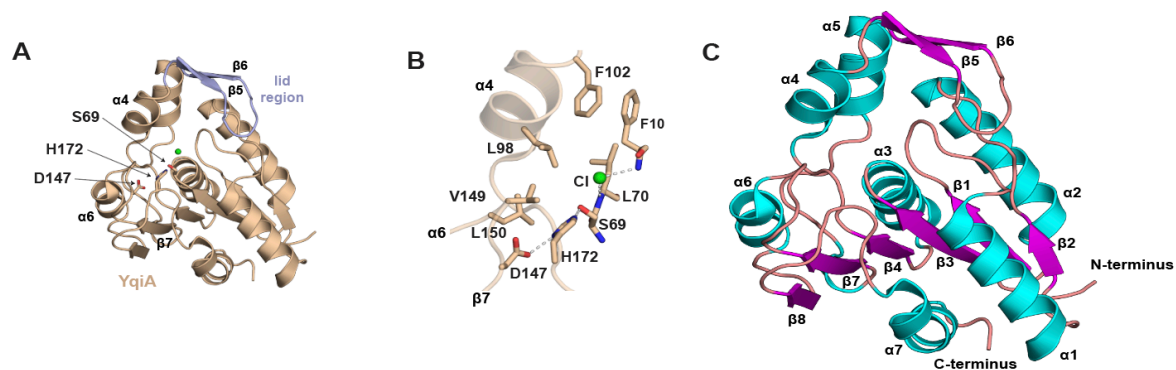

**Supplementary figure S7. Structural analysis of YqiA.** A) YqiA (beige) crystallised as a monomer, where  $\beta$  strands 4 and 5 form a lid region. The catalytic triad (Ser69, Asp147, His172) is more exposed than in the YjfP structure. B) Interactions between side chains of the catalytic triad are shown. A chlorine atom (green) is modelled in the oxyanion hole coordinated by backbone amides of Leu70 and Phe10. Several hydrophobic side residues on  $\alpha$  helix 4 and a loop between  $\beta$  strand 7 and  $\alpha$  helix 6 are likely important for substrate recognition. C) Secondary structure elements are displayed as follows:  $\alpha$  helices (cyan),  $\beta$  sheets (magenta), and loops (beige).

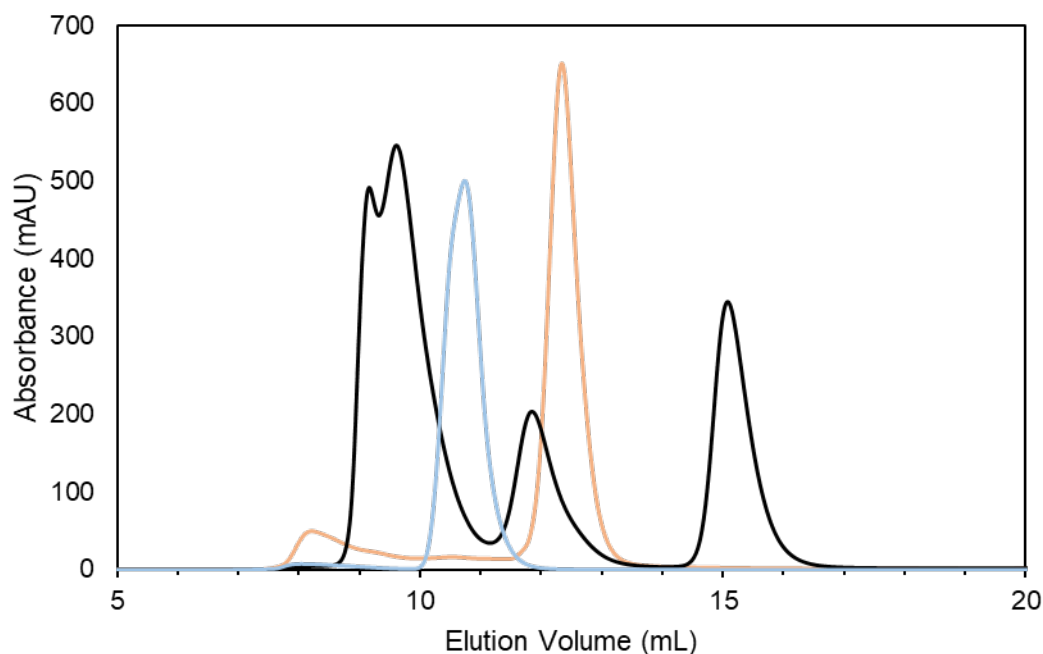

**Supplementary figure S8. Gel-filtration chromatogram of YjfP and YqiA.** Gel filtration of YjfP (cyan), YqiA (orange), and protein standards (black). The protein standards run include thyroglobulin (670 kDa), bovine gamma globulin (158 kDa), chicken ovalbumin (44 kDa), and equine myoglobin (17 kDa). YjfP elutes after bovine gamma globulin and before chicken ovalbumin, consistent with a 54 kDa homodimer. YqiA elutes after chicken ovalbumin consistent with a 22 kDa monomer.

## Supplementary references

1. Ramage B, *et al.* Comprehensive Arrayed Transposon Mutant Library of *Klebsiella pneumoniae* Outbreak Strain KPNIH1. *J Bacteriol* **199**, (2017).
